# Supplementary material for: Evaluating the protein coding potential of exonized transposable element sequences
Source: PubMed Central journal article supplement (PMC2203978; doi:10.1186/1745-6150-2-31), 2007-11-26
Supplement: 1745-6150-2-31-S1.pdf [file 1745-6150-2-31-S1.pdf]

**Supplementary Table 1 - List of 124 TE-associated Pfam protein domains**

| Accession | ID              | Description                                           |
|-----------|-----------------|-------------------------------------------------------|
| PF00075   | RnaseH          | RNase H                                               |
| PF00077   | RVP             | Retroviral aspartyl protease                          |
| PF00078   | RVT_1           | Reverse transcriptase (RNA-dependent DNA polymerase)  |
| PF00098   | zf-CCHC         | Zinc knuckle                                          |
| PF00424   | REV             | REV protein (anti-repression trans-activator protein) |
| PF00429   | TLV_coat        | ENV polyprotein (coat polyprotein)                    |
| PF00469   | F-protein       | Negative factor, (F-Protein) or Nef                   |
| PF00516   | GP120           | Envelope glycoprotein GP120                           |
| PF00517   | GP41            | Envelope Polyprotein GP41                             |
| PF00522   | VPR             | VPR/VPX protein                                       |
| PF00539   | Tat             | Transactivating regulatory protein (Tat)              |
| PF00540   | Gag_p17         | gag gene protein p17 (matrix protein)                 |
| PF00552   | Integrase       | Integrase DNA binding domain                          |
| PF00558   | Vpu             | Vpu protein                                           |
| PF00559   | Vif             | Retroviral Vif (Viral infectivity) protein            |
| PF00589   | Phge_integrase  | Phage integrase family                                |
| PF00607   | Gag_p24         | gag gene protein p24 (core nucleocapsid protein)      |
| PF00665   | rve             | Integrase core domain                                 |
| PF00692   | dUTPase         | dUTPase                                               |
| PF00872   | Transposase_mut | Transposase, Mutator family                           |
| PF00906   | Hepatitis_core  | Hepatitis core antigen                                |
| PF00971   | EIAV_GP90       | EIAV coat protein, gp90                               |
| PF00979   | Reovirus_cap    | Reovirus outer capsid protein, Sigma 3                |
| PF01021   | TYA             | TYA transposon protein                                |
| PF01045   | EIAV_GP45       | EIAV glycoprotein, gp45                               |
| PF01054   | MMTV_SAg        | Mouse mammary tumour virus superantigen               |
| PF01140   | Gag_MA          | Matrix protein (MA), p15                              |
| PF01141   | Gag_p12         | Gag polyprotein, inner coat protein p12               |
| PF01359   | Transposase_1   | Transposase                                           |
| PF01385   | Transposase_2   | Probable transposase                                  |
| PF01498   | Transposase_5   | Transposase                                           |
| PF01526   | Transposase_7   | Transposase                                           |
| PF01527   | Transposase_8   | Transposase                                           |
| PF01548   | Transposase_9   | Transposase                                           |
| PF01609   | Transposase_11  | Transposase DDE domain                                |
| PF01610   | Transposase_12  | Transposase                                           |
| PF01695   | IstB            | IstB-like ATP binding protein                         |
| PF01710   | Transposase_14  | Transposase                                           |
| PF01797   | Transposase_17  | Transposase IS200 like                                |
| PF02022   | Integrase_Zn    | Integrase Zinc binding domain                         |
| PF02093   | Gag_p30         | Gag P30 core shell protein                            |
| PF02228   | Gag_p19         | Major core protein p19                                |
| PF02281   | Transposase_Tn5 | Transposase Tn5 dimerisation domain                   |
| PF02316   | Mu_DNA_bind     | Mu DNA-binding domain                                 |
| PF02337   | Gag_p10         | Retroviral GAG p10 protein                            |
| PF02371   | Transposase_20  | Transposase IS116/IS110/IS902 family                  |
| PF02411   | MerT            | MerT mercuric transport protein                       |
| PF02720   | DUF222          | Domain of unknown function DUF222                     |
| PF02813   | Retro_M         | Retroviral M domain                                   |
| PF02892   | zf-BED          | BED zinc finger                                       |
| PF02914   | Mu_transposase  | Bacteriophage Mu transposase                          |
| PF02920   | Integrase_DNA   | DNA binding domain of tn916 integrase                 |
| PF02959   | Tax             | HTLV Tax                                              |

|         |                 |                                                              |
|---------|-----------------|--------------------------------------------------------------|
| PF02992 | Transposase_21  | Transposase family tnp2                                      |
| PF02994 | Transposase_22  | L1 transposable element                                      |
| PF02998 | Lentiviral_Tat  | Lentiviral Tat protein                                       |
| PF03004 | Transposase_24  | Plant transposase (PttA/En/Spm family)                       |
| PF03017 | Transposase_23  | TNP1/EN/SPM transposase                                      |
| PF03050 | Transposase_25  | Transposase IS66 family                                      |
| PF03056 | GP36            | Env gp36 protein (HERV/MMTV type)                            |
| PF03078 | ATHILA          | ATHILA ORF-1 family                                          |
| PF03108 | MuDR            | MuDR family transposase                                      |
| PF03184 | DDE             | DDE superfamily endonuclease                                 |
| PF03221 | Transposase_Tc5 | Tc5 transposase                                              |
| PF03274 | Foamy_BEL       | Foamy virus BEL 1/2 protein                                  |
| PF03276 | Gag_spuma       | Spumavirus gag protein                                       |
| PF03400 | Transposase_27  | IS1 transposase                                              |
| PF03408 | Foamy_virus_ENV | Foamy virus envelope protein                                 |
| PF03539 | Spuma_A9PTase   | Spumavirus aspartic protease (A9)                            |
| PF03708 | Avian_gp85      | Avian retrovirus envelope protein, gp85                      |
| PF03716 | WCCH            | WCCH motif                                                   |
| PF03732 | Retrotrans_gag  | Retrotransposon gag protein                                  |
| PF03811 | Ins_element1    | Insertion element protein                                    |
| PF04094 | DUF390          | Protein of unknown function (DUF390)                         |
| PF04160 | Borrelia_orfX   | Orf-X protein                                                |
| PF04195 | Transposase_28  | Putative gypsy type transposon                               |
| PF04218 | CENP-B_N        | CENP-B N-terminal DNA-binding domain                         |
| PF04236 | Transp_Tc5_C    | Tc5 transposase C-terminal domain                            |
| PF04582 | Reo_sigmaC      | Reovirus sigma C capsid protein                              |
| PF04693 | Transposase_29  | Archaeal putative transposase ISC1217                        |
| PF04740 | Transposase_30  | Bacillus transposase protein                                 |
| PF04754 | Transposase_31  | Putative transposase, YhgA-like                              |
| PF04827 | Plant_tran      | Plant transposon protein                                     |
| PF04937 | DUF659          | Protein of unknown function (DUF 659)                        |
| PF04986 | Transposase_32  | Putative transposase                                         |
| PF05052 | MerE            | MerE protein                                                 |
| PF05344 | DUF746          | Domain of Unknown Function (DUF746)                          |
| PF05380 | Peptidase_A17   | Pao retrotransposon peptidase                                |
| PF05399 | EVI2A           | Ectropic viral integration site 2A protein (EVI2A)           |
| PF05457 | Transposase_33  | Sulfolobus transposase                                       |
| PF05485 | THAP            | THAP domain                                                  |
| PF05598 | DUF772          | Sulfolobus solfataricus protein of unknown function (DUF772) |
| PF05599 | Deltaretro_Tax  | Deltaretrovirus Tax protein                                  |
| PF05621 | TniB            | Bacterial TniB protein                                       |
| PF05699 | hATC            | hAT family dimerisation domain                               |
| PF05717 | Transposase_34  | IS66 Orf2 like protein                                       |
| PF05754 | DUF834          | Domain of unknown function (DUF834)                          |
| PF05840 | Phage_GPA       | Bacteriophage replication gene A protein (GPA)               |
| PF05851 | Lentivirus_VIF  | Lentivirus virion infectivity factor (VIF)                   |
| PF05858 | BIV_Env         | Bovine immunodeficiency virus surface envelope protein (ENV) |
| PF05928 | Zea_mays_MuDR   | Zea mays MURB-like protein (MuDR)                            |
| PF06527 | TniQ            | TniQ                                                         |
| PF06815 | RVT_connect     | Reverse transcriptase connection domain                      |
| PF06817 | RVT_thumb       | Reverse transcriptase thumb domain                           |
| PF07253 | Gypsy           | Gypsy protein                                                |
| PF07282 | Transposase_35  | Putative transposase DNA-binding domain                      |
| PF07567 | zf-C2HC_plant   | Protein of unknown function, DUF1544                         |
| PF07572 | BCNT            | Bucentaur or craniofacial development                        |
| PF07592 | Transposase_36  | Rhodopirellula transposase                                   |
| PF07727 | RVT_2           | Reverse transcriptase (RNA-dependent DNA polymerase)         |
| PF07999 | RHSP            | Retrotransposon hot spot protein                             |

|         |               |                                        |
|---------|---------------|----------------------------------------|
| PF08284 | RVP_2         | Retroviral aspartyl protease           |
| PF08333 | DUF1725       | Protein of unknown function (DUF1725)  |
| PF08483 | IstB_N        | IstB-like ATP binding N-terminal       |
| PF08705 | Gag_p6        | Gag protein p6                         |
| PF08721 | TnsA_C        | TnsA endonuclease C terminal           |
| PF08722 | TnsA_N        | TnsA endonuclease N terminal           |
| PF08723 | Gag_p15       | Gag protein p15                        |
| PF09035 | Tn916-Xis     | Excisionase from transposon Tn916      |
| PF09039 | Mu_I-gamma    | Mu DNA binding, I gamma subdomain      |
| PF09077 | Phage-MuB_C   | Mu B transposition protein, C terminal |
| PF09293 | RNaseH_C      | T4 RNase H, C terminal                 |
| PF09299 | Mu-transpos_C | Mu transposase, C-terminal             |
| PF09322 | DUF1979       | Domain of unknown function (DUF1979)   |
