# Supplementary material for: Evaluating the protein coding potential of exonized transposable element sequences
Source: PubMed Central journal article supplement (PMC2203978; doi:10.1186/1745-6150-2-31), 2007-11-26
Supplement: 1745-6150-2-31-S2.pdf [file 1745-6150-2-31-S2.pdf]

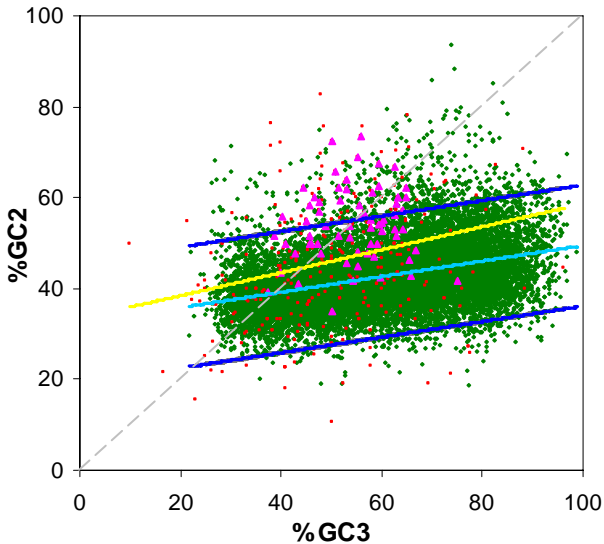

- CCDS (w without TEs)
- TE-derived fragments (not Alu)
- ▲ Alu-derived fragments
- Linear regression: CCDS (w without TEs)
- 95% confidence band: CCDS (w without TEs)
- Linear regression: TE-derived fragments
